# Supplementary material
Source: publisher site journal article supplement (https://www.dovepress.com/article/268561)
Supplement: Supplementary file 1 [file get_supplementary_file.php]

Supplementary Table 1: Obstetric and maternal service utilization history of women who had delivered a baby in the past one year in west Shewa, Oromia region, Ethiopia (n=354)

| Variables | Response | Frequency | Percent |
| --- | --- | --- | --- |
| Number of alive children | One | 71 | 20.1 |
| Two and three | 129 | 36.4 |
| Four and more | 154 | 43.5 |
| History of FP Utilization | Yes | 270 | 76.3 |
| No | 84 | 23.7 |
| Type of MFPM used | Oral contraceptives | 53 | 19.6 |
| Implant | 104 | 38.5 |
| Injectable | 95 | 35.2 |
| IUDS | 18 | 6.7 |
| ANC follow up | Yes | 274 | 77.4 |
| No | 80 | 22.6 |
| Place of delivery | Health Institution | 221 | 62.4 |
| Home | 133 | 37.6 |
| PNC Utilization | Yes | 186 | 52.5 |
| No | 168 | 47.5 |
| Approximate distance of health institution from residence in Km | 1 | 98 | 27.7 |
| 2- 5 | 179 | 50.6 |
| > 5km | 77 | 21.7 |
